# Supplementary material for: Structural properties, magnetic interactions, magnetocaloric effect and critical behaviour of cobalt doped La0.7Te0.3MnO3
Source: Royal Society of Chemistry journal article supplement (doi:10.1039/c5ra13408k), 2015-01-01
Supplement: c5ra13408k1.pdf [file c5ra13408k1.pdf]

## Supplementary information

### Structural properties, magnetic interactions, magnetocaloric effect and critical behaviour of cobalt doped $\text{La}_{0.7}\text{Te}_{0.3}\text{MnO}_3$

Bhagya Uthaman<sup>1</sup>, K.S.Anand<sup>1</sup>, Rajesh Kumar Rajan<sup>1</sup>, Htet H. Kyaw<sup>2</sup>, Senoy Thomas<sup>1</sup>, Salim Al-Harhi<sup>2</sup>, K.G.Suresh<sup>3</sup> and Manoj Raama Varma<sup>1\*</sup>

<sup>1</sup>Materials Science and Technology Division, CSIR-National Institute for Interdisciplinary Science and Technology, Thiruvananthapuram -695 019, India.

<sup>2</sup>Department of Physics, Sultan Qaboos University, Muscat PC 123, Sultanate of Oman

<sup>3</sup>Department of Physics, Indian Institute of Technology, Mumbai-400076, Mumbai, India

\*Author to whom any correspondence should be addressed: [manoj@niist.res.in](mailto:manoj@niist.res.in)

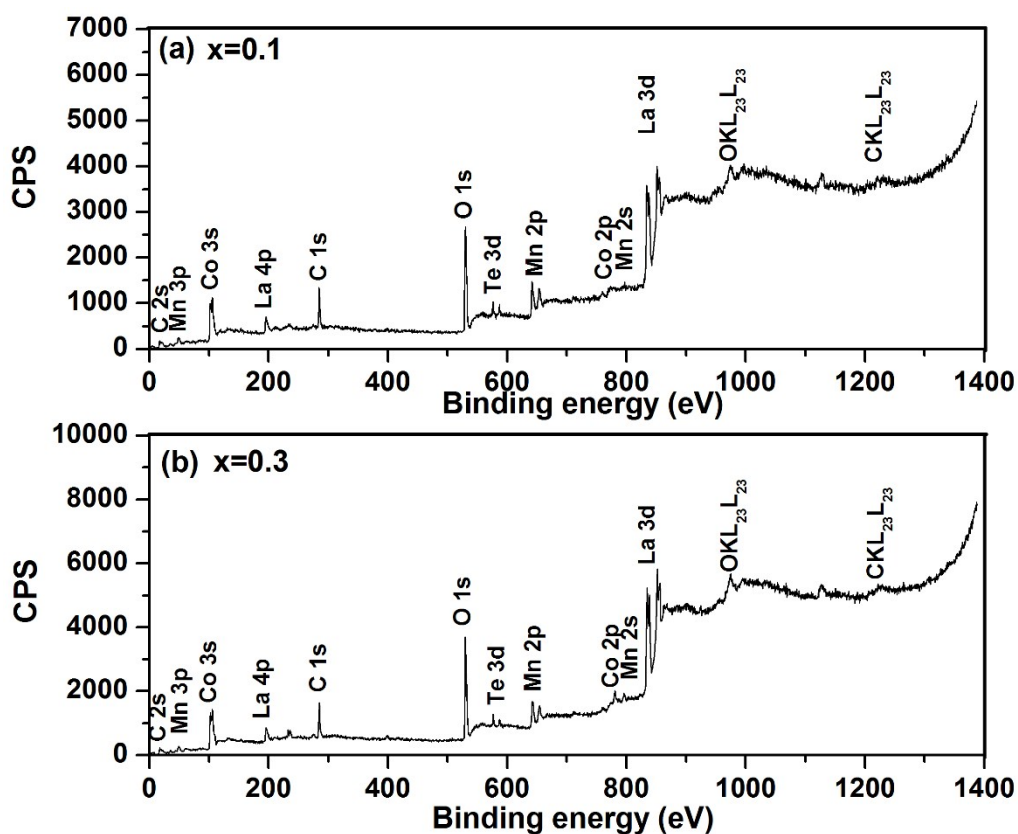

Fig. S1. XPS wide scan spectra of  $\text{La}_{0.7}\text{Te}_{0.3}\text{Mn}_{1-x}\text{Co}_x\text{O}_3$  (a)  $x=0.1$  and (b)  $x=0.3$ .

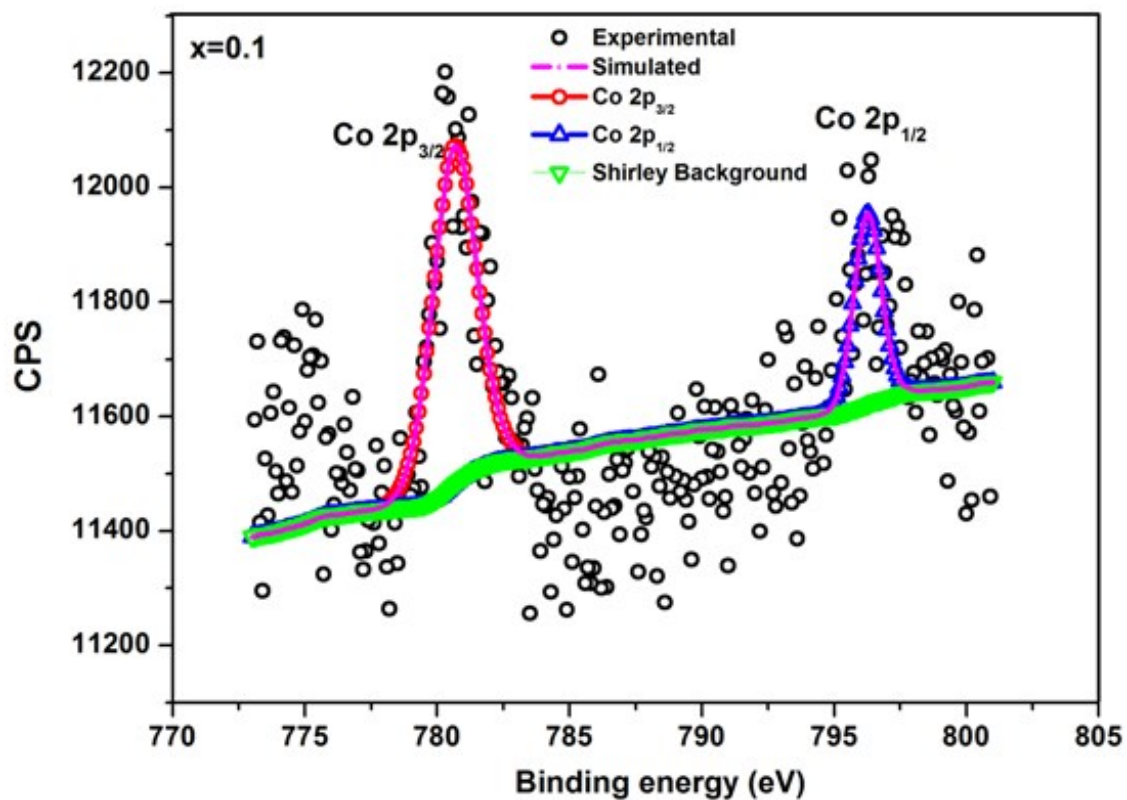

Fig. S2. Co 2p XPS spectra of  $\text{La}_{0.7}\text{Te}_{0.3}\text{Mn}_{1-x}\text{Co}_x\text{O}_3$  for  $x=0.1$ .

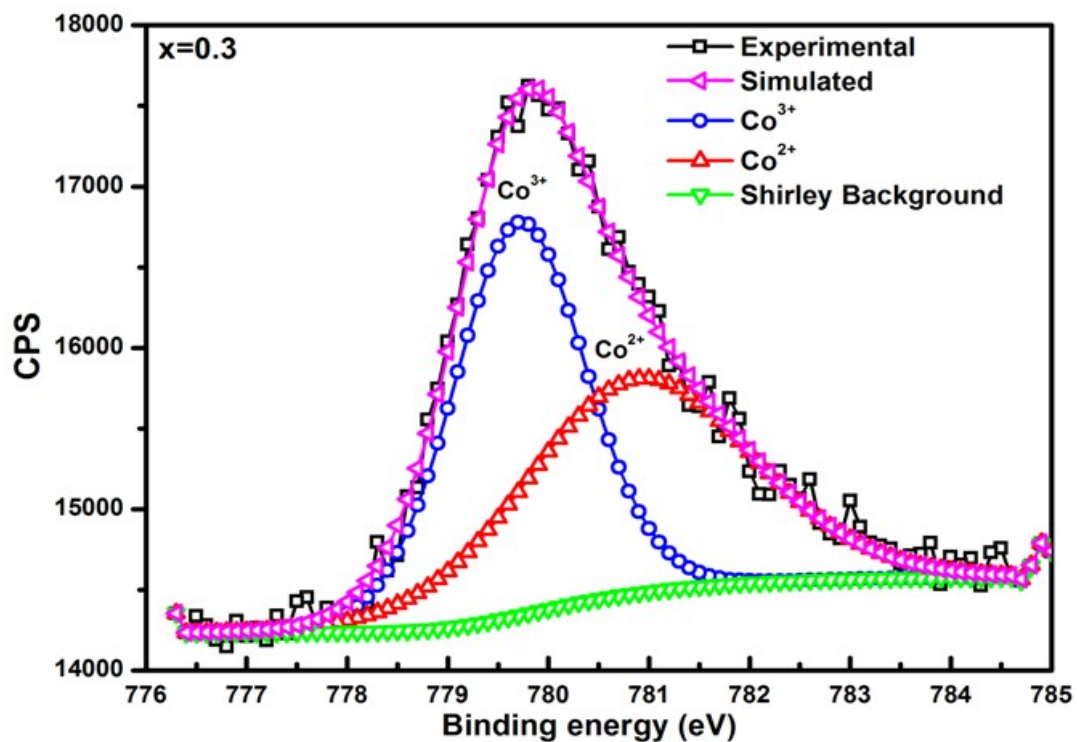

Fig. S3.  $\text{Co } 2p_{3/2}$  XPS spectra of  $\text{La}_{0.7}\text{Te}_{0.3}\text{Mn}_{1-x}\text{Co}_x\text{O}_3$  for  $x=0.3$

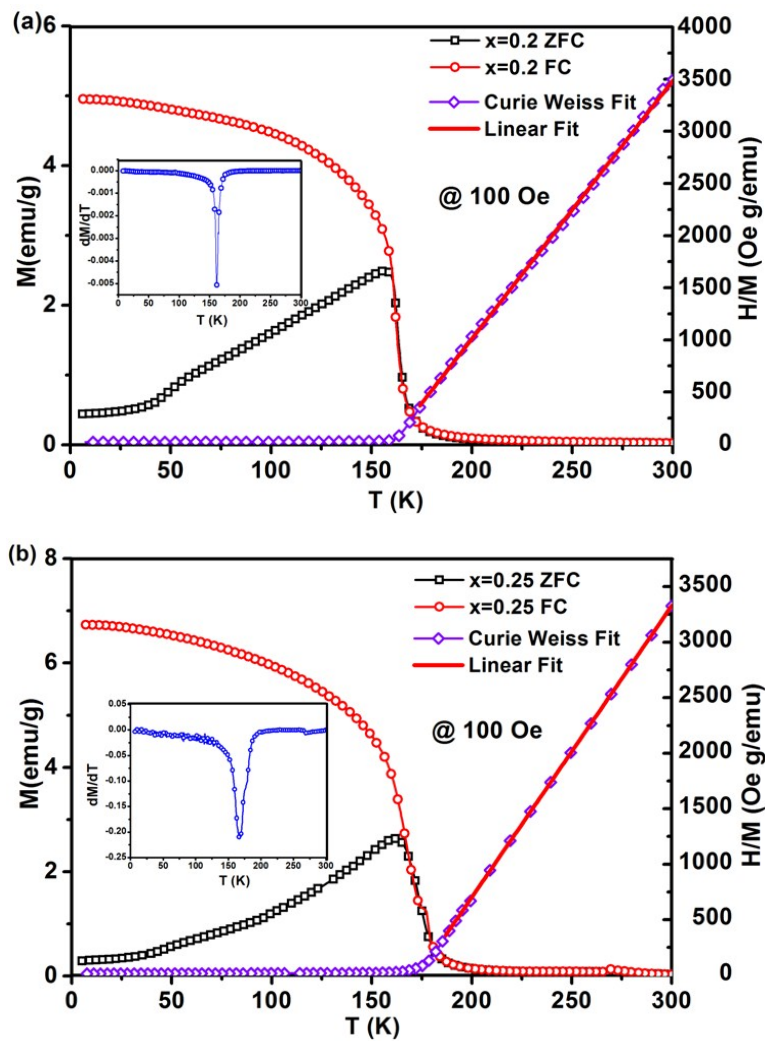

**Fig. S4.** Magnetization as a function of temperature for  $\text{La}_{0.7}\text{Te}_{0.3}\text{Mn}_{1-x}\text{Co}_x\text{O}_3$  ( $x=0.2$  and  $0.25$ ) measured at  $H = 100$  Oe under the zero field-cooled (ZFC) and field-cooled (FC) modes.
